# Supplementary material
Source: PubMed Central journal article supplement (PMC2992316)

# Supplementary figure-5 (Malliri)

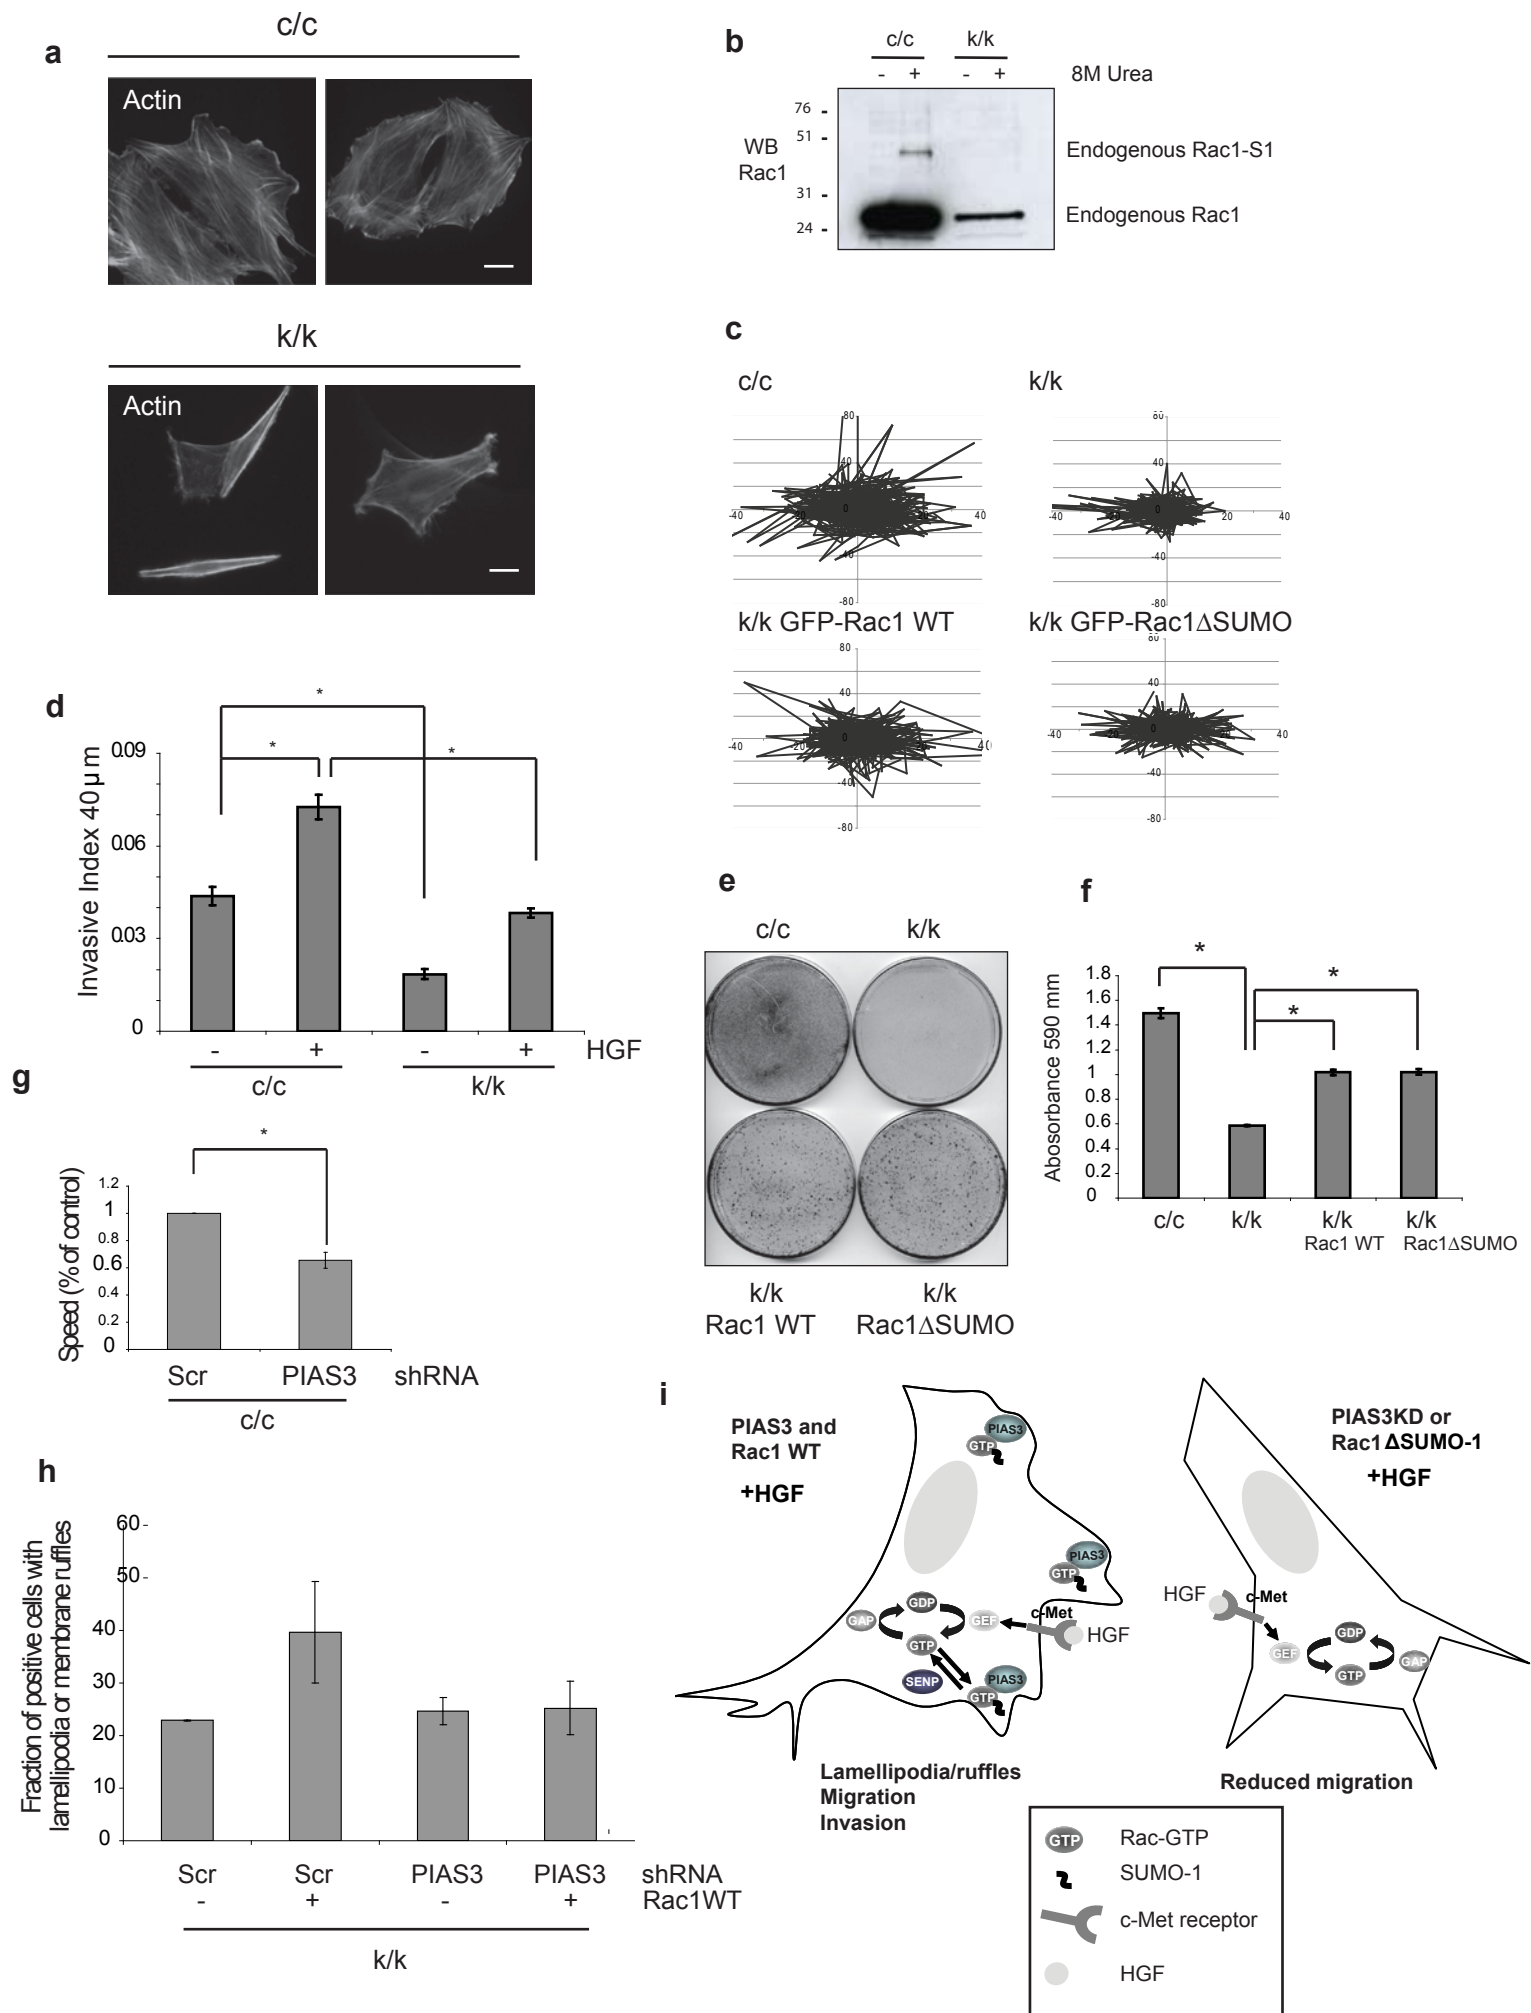

Supplement: NIHMS32117-supplement-7.pdf [file NIHMS32117-supplement-7.pdf]

**Fig. 1a**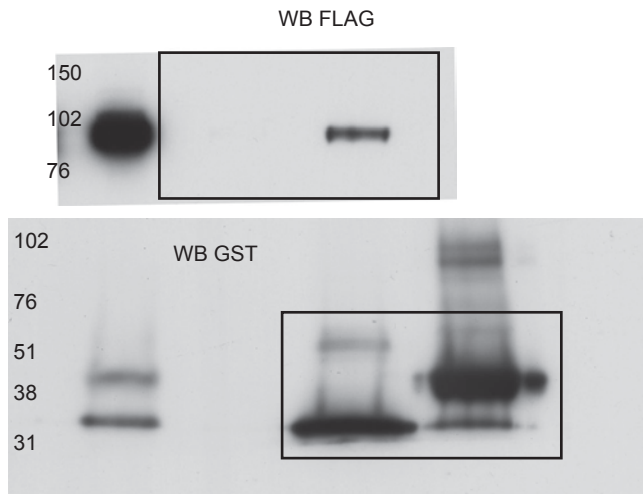**Fig. 1b**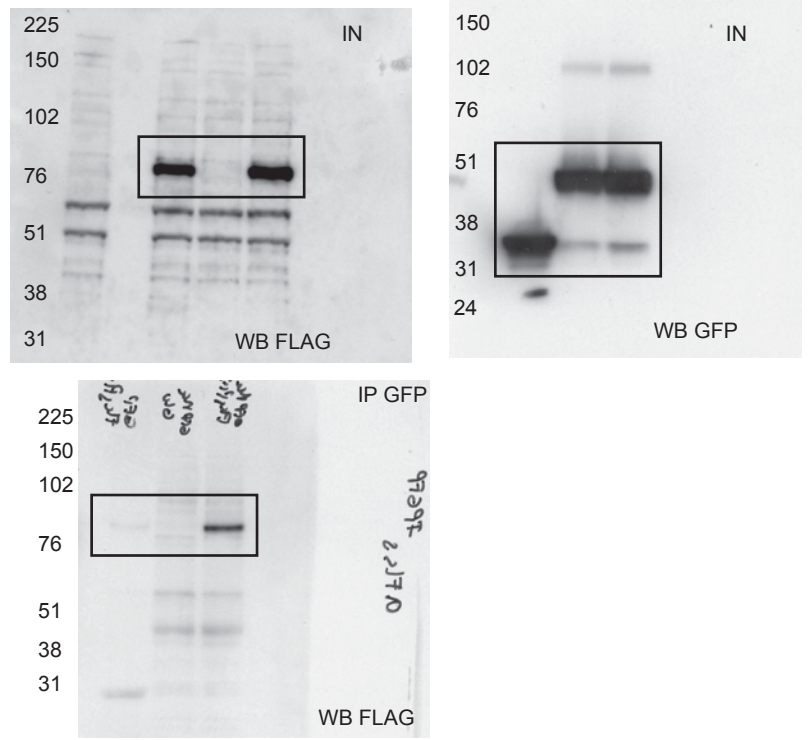**Fig. 1c**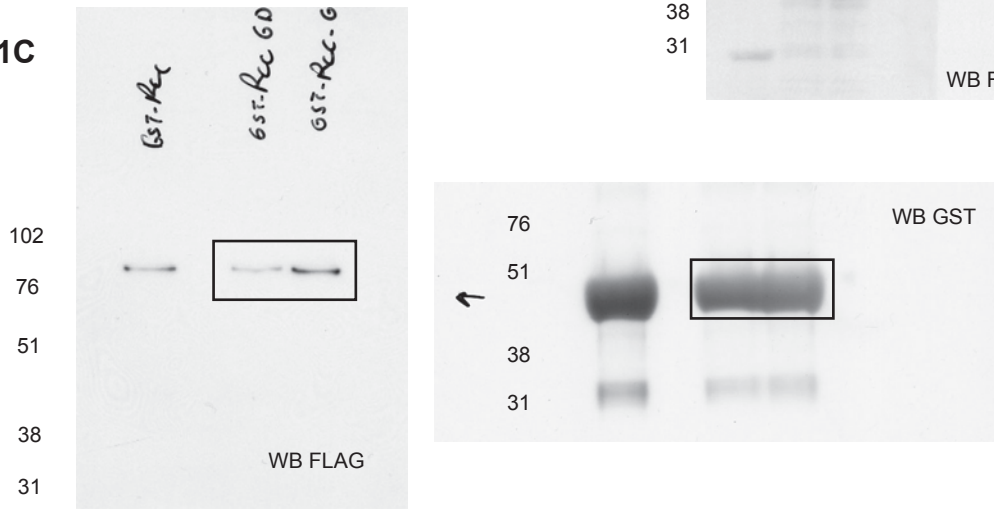**Fig. 1d**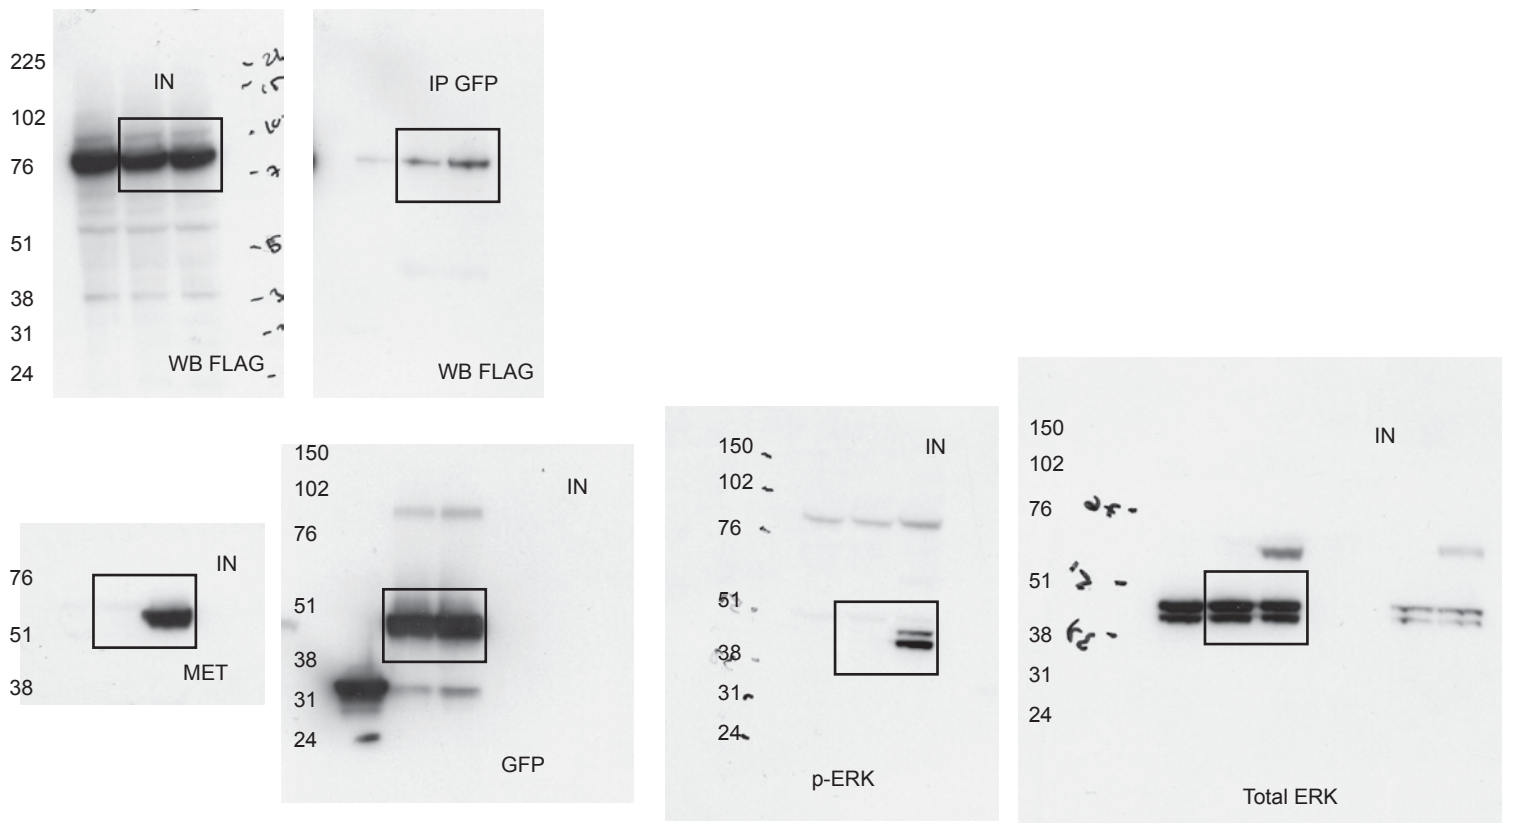

Supplement: NIHMS32117-supplement-8.pdf [file NIHMS32117-supplement-8.pdf]
